# Supplementary material
Source: PubMed Central journal article supplement (PMC8265366)
Supplement: ONCO-26-610-s001.pdf [file ONCO-26-610-s001.pdf]

Supplemental Figures for:  
Pre-emptive Versus Reactive Topical Clobetasol for Regorafenib-Induced Hand-Foot Reactions: A Pre-Planned Analysis of the ReDOS Trial  
Aminah Jatoi et al.

**Figure S1.** Exploratory quality of life data for all 4 arms showed no major differences between study arms.

Supplementary Figure 1: Quality of Life in all 4 Study Arms

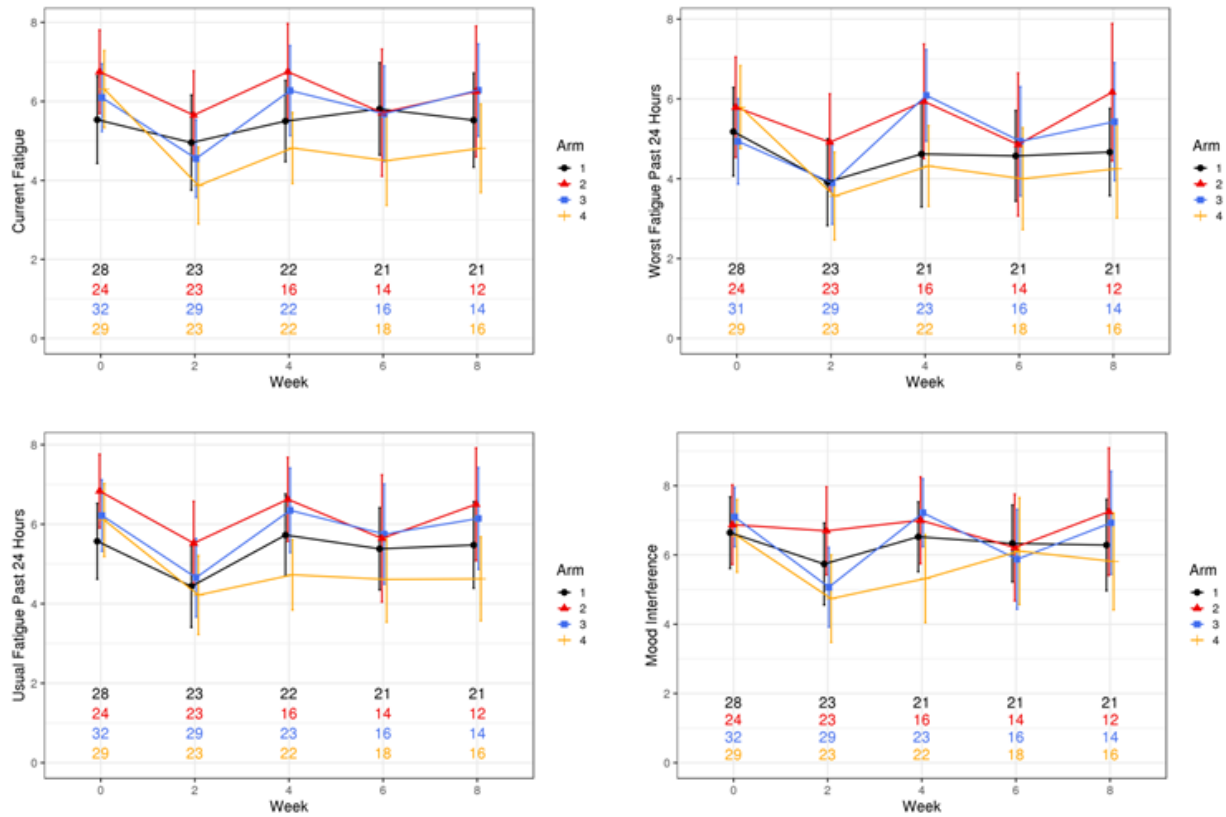

Figure S1a.

Supplemental Figures for:  
Pre-emptive Versus Reactive Topical Clobetasol for Regorafenib-Induced Hand-Foot Reactions: A Pre-Planned Analysis of the ReDOS Trial  
Aminah Jatoi et al.

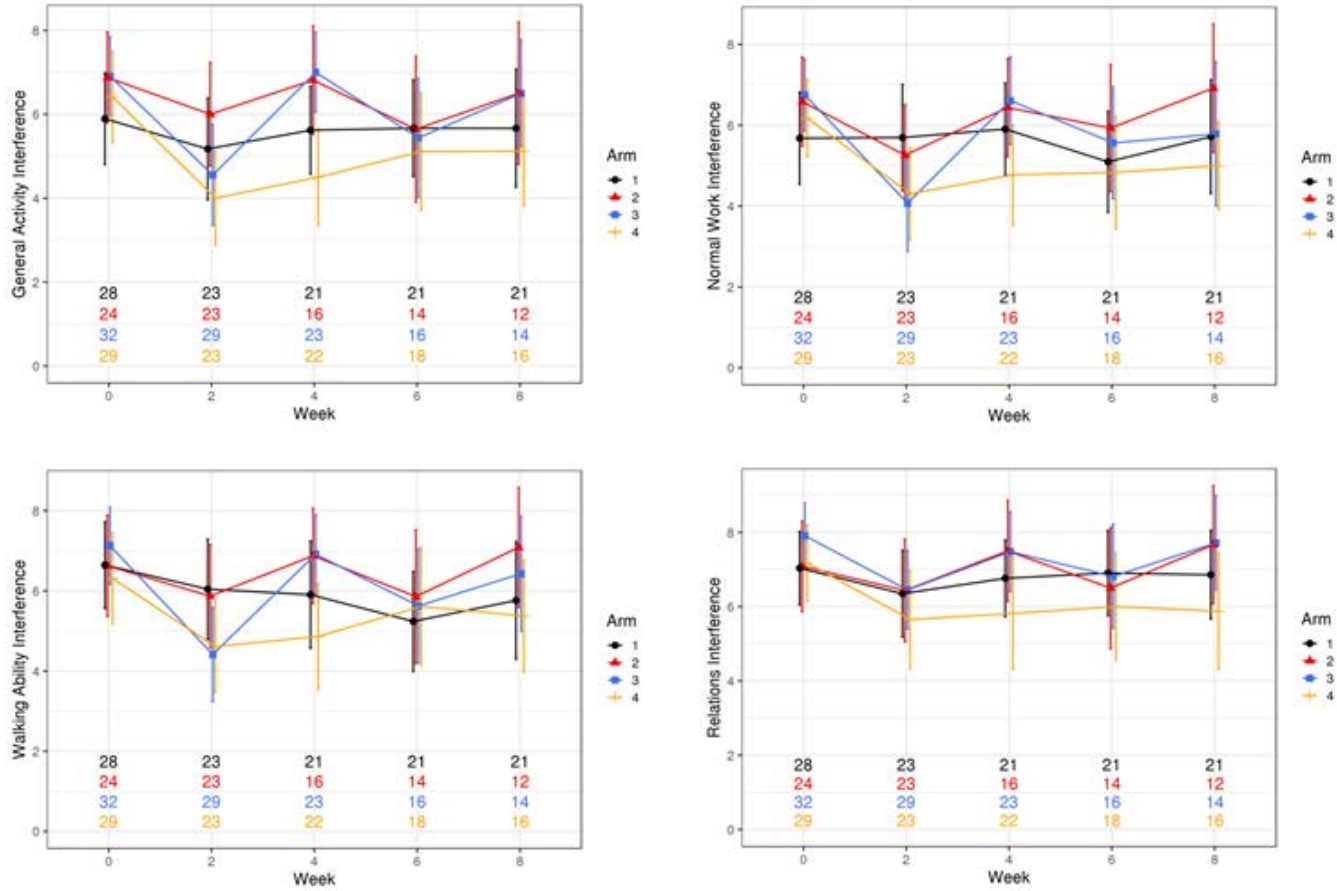

Figure S1b

Supplemental Figures for:  
Pre-emptive Versus Reactive Topical Clobetasol for Regorafenib-Induced Hand-Foot Reactions: A Pre-Planned Analysis of the ReDOS Trial  
Aminah Jatoi et al.

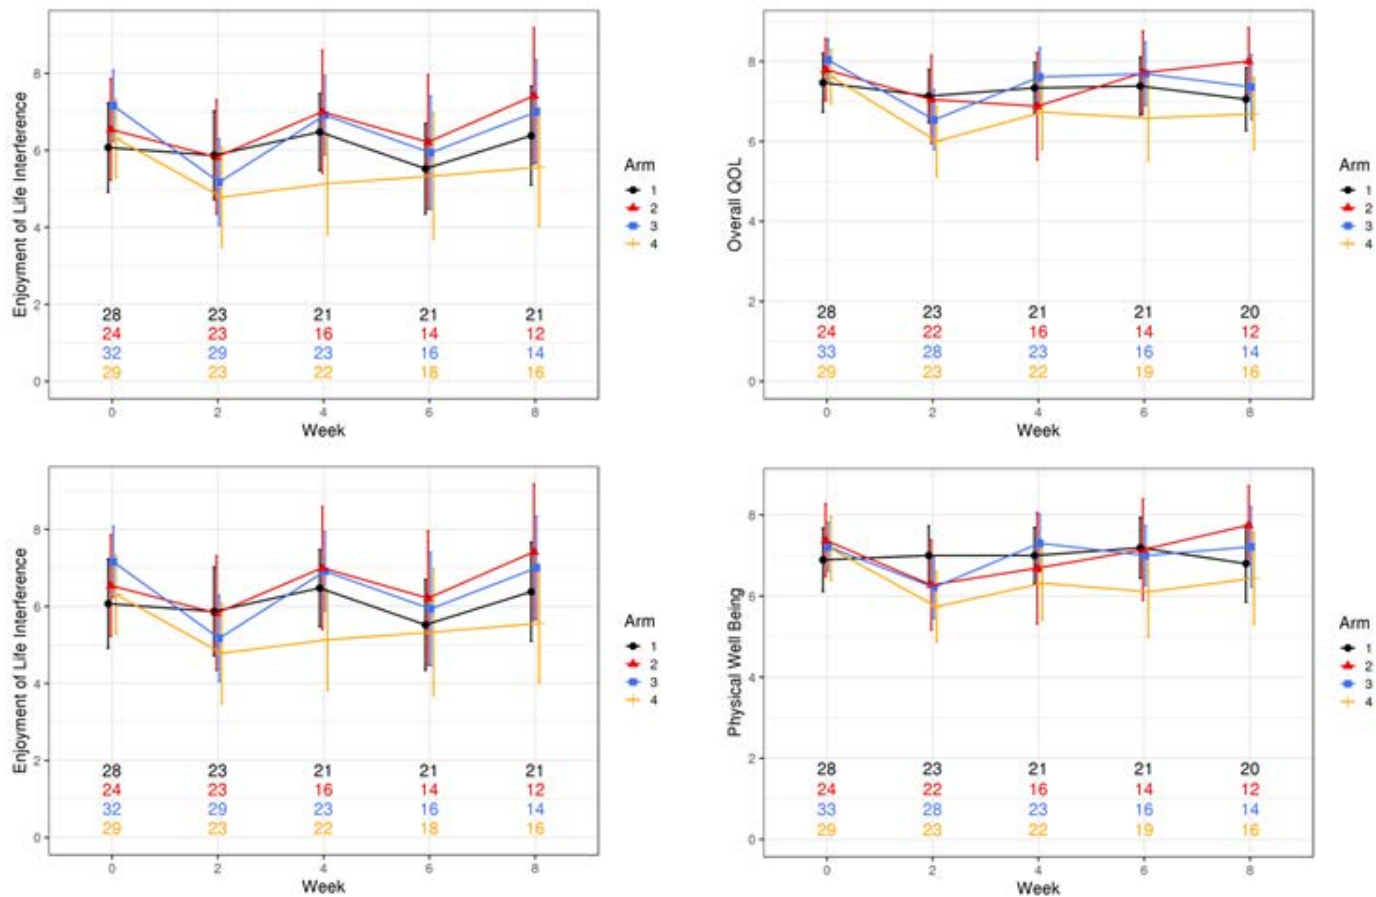

Figure S1c

Supplemental Figures for:  
Pre-emptive Versus Reactive Topical Clobetasol for Regorafenib-Induced Hand-Foot Reactions: A Pre-Planned Analysis of the ReDOS Trial  
Aminah Jatoi et al.

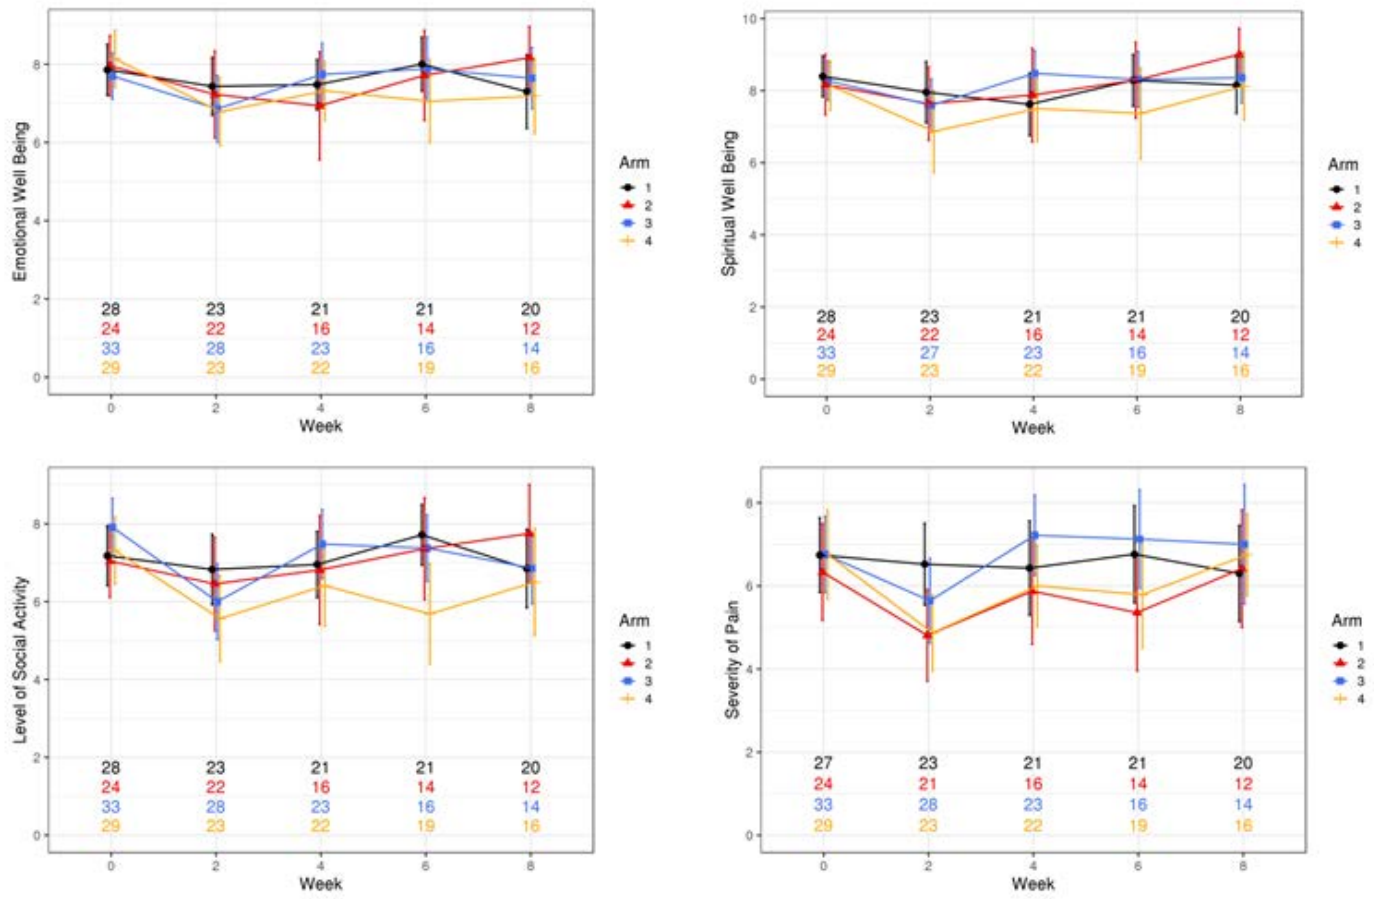

Figure S1d

Supplemental Figures for:  
Pre-emptive Versus Reactive Topical Clobetasol for Regorafenib-Induced Hand-Foot Reactions: A Pre-Planned Analysis of the ReDOS Trial  
Aminah Jatoi et al.

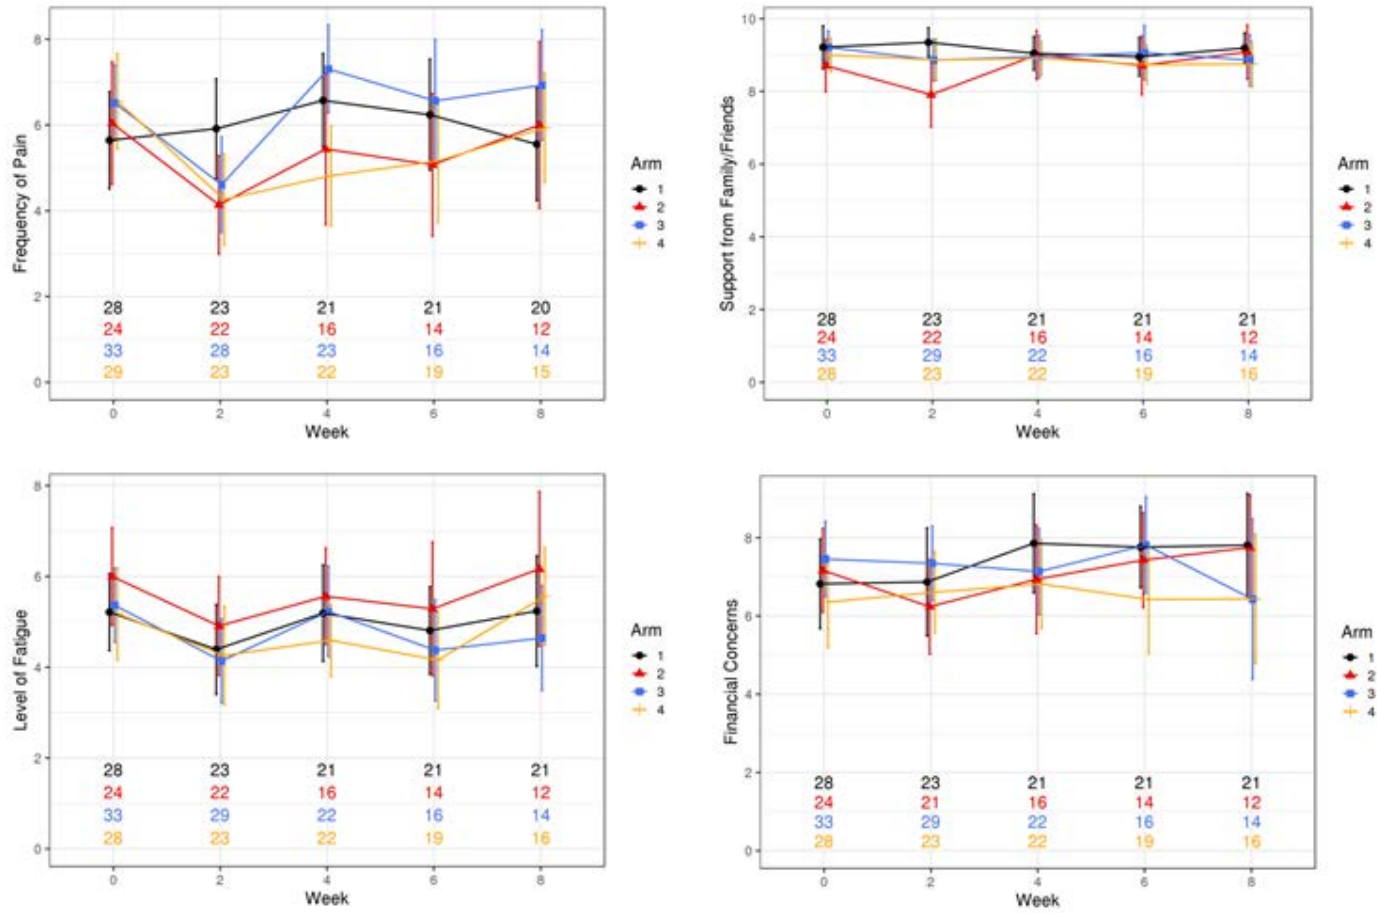

Figure S1e

Supplemental Figures for:  
Pre-emptive Versus Reactive Topical Clobetasol for Regorafenib-Induced Hand-Foot Reactions: A Pre-Planned Analysis of the ReDOS Trial  
Aminah Jatoi et al.

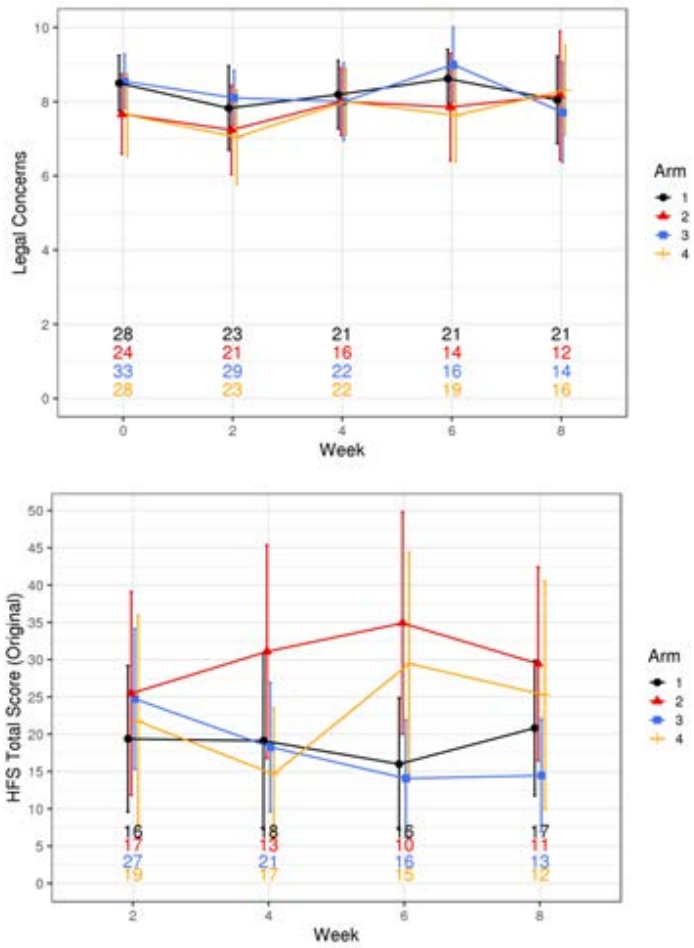

Figure S1f.
